# Supplementary material for: Rapid and fast strategy for the determination of glutathione in the presence of vitamin B6in biological and pharmaceutical samples using a nanostructure based electrochemical sensor
Source: Royal Society of Chemistry journal article supplement (doi:10.1039/c5ra08433d), 2015-01-01
Supplement: c5ra08433d1.pdf [file c5ra08433d1.pdf]

*Supplementary data*

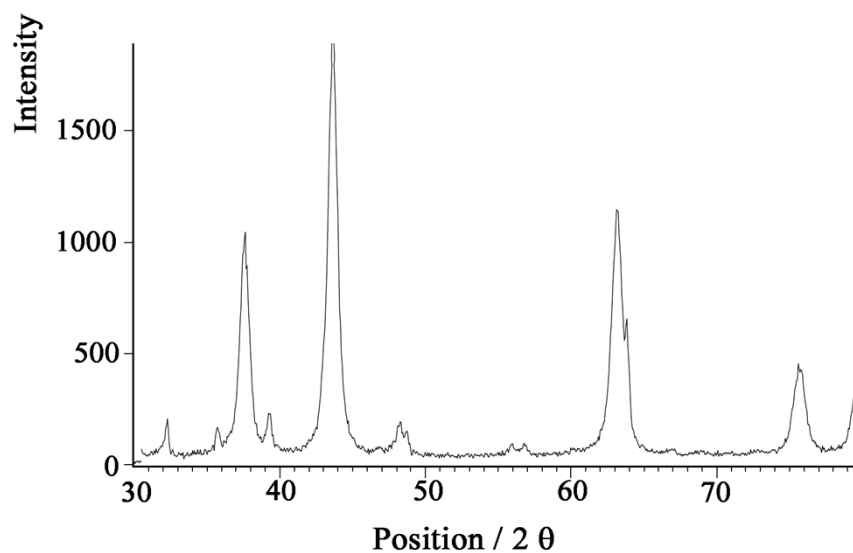

**Figure 1S** A typical XRD patterns of the NiO nanoparticles synthesis in this work.
